# Supplementary material
Source: PubMed Central journal article supplement (PMC1405236)
Supplement: NIHMS6962-supplement-Figure7.pdf [file NIHMS6962-supplement-Figure7.pdf]

**NE<sub>K</sub>B** →

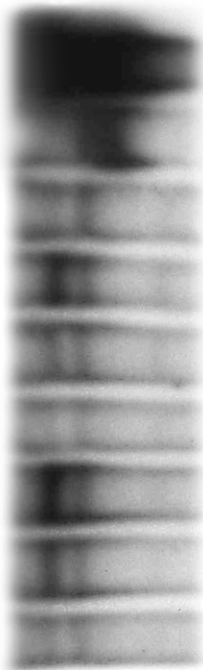

**Nonspecific Competitor**

**Specific Competitor**

**Control**

**40  $\mu$ M SH - 30 min, wash, 30 min**

**1  $\mu$ M Helenalin - 2h, 40  $\mu$ M SH - 30 min, wash, 30 min**

**5  $\mu$ M Helenalin - 2h, 40  $\mu$ M SH - 30 min, wash, 30 min**

**4 mM SH - 30 min, wash, 30 min**

**1  $\mu$ M Helenalin - 2h, 4 mM SH - 30 min, wash, 30 min**

**5  $\mu$ M Helenalin - 2h, 4 mM SH - 30 min, wash, 30 min**

**HMEC**
